# Supplementary material
Source: MDPI journal article supplement (https://www.mdpi.com/2073-4441/15/12/2153)
Supplement: s1 [file s1]

**Table S1.** Parameters used to measure and the method of analyzing the wastewater samples in the batch experiment.

| Parameters                      | Analyzed methods                 |
|---------------------------------|----------------------------------|
| Total solids (TS)               | Gravimetric method               |
| Suspended solids (SS)           | Gravimetric method               |
| Volatile solids (VS)            | Gravimetric method               |
| Chemical oxygen demand (COD)    | Close reflux, Titrimetric method |
| Temperature                     | Thermometer                      |
| pH                              | pH meter                         |
| Alkalinity                      | Direct titration method          |
| VFA                             | Direct titration method          |
| TKN                             | Macro-Kjeldahl method            |
| NH <sub>4</sub> <sup>+</sup> -N | Tritation method                 |

Source: APHA, AWWA and WEF (2012).

**Table S2.** The Biogas system installation cost.

|                                                                  | US Dollars |
|------------------------------------------------------------------|------------|
| Construction cost                                                | 2,550,415  |
| Maintenance cost / year (4 daily labor × 9 US \$/day × 300 days) | 10,676     |
| Electricity cost for system operation / year                     | 64,057     |
| Chemicals and materials / year                                   | 741        |
| Total cost in the first year (1)                                 | 2,625,889  |

Remark: Data obtained from the case study; palm oil mill installed EFB press.

**Table S3.** The additional cost from EFB pressing installation.

| Cost                                                   | US Dollars |
|--------------------------------------------------------|------------|
| Machinery cost                                         | 88,968     |
| Maintenance cost / year                                | 12,337     |
| Electricity cost for system operation / year increased | 46,987     |
| Chemicals and materials / year                         | 593        |
| Total cost in the first year for EFB press (2)         | 148,885    |

Remark: Data obtained from the case study; palm oil mill installed EFB press.

**Table S4.** The cost of EFB pressing installation into the system.

| Cost                                                             | US Dollars |                 |
|------------------------------------------------------------------|------------|-----------------|
|                                                                  | Project A  | Project B (1+2) |
| Construction cost                                                | 2,550,415  | 2,580,071       |
| Machinery cost                                                   |            | 88,968          |
| Maintenance cost / year (4 daily labor × 9 US \$/day × 300 days) | 10,676     | 23,013          |
| Electricity cost for system operation / year                     | 64,057     | 110,065         |
| Chemicals and materials / year                                   | 741        | 1,335           |
| Total cost in the first year (1)                                 | 2,625,889  | 2,804,431       |

**Table S5.** Income from projects.

| Items                                                  | Project A | Project B |
|--------------------------------------------------------|-----------|-----------|
| Electricity to power grid (0.12 US\$/kWh) (US\$)       | 939,502   | 1,879,004 |
| Crude palm oil (388 tons/year and 0.89 US\$/kg) (US\$) |           | 345,907   |
| Net Income/year (US\$)                                 | 939,502   | 2,224,911 |

**Table S6.** Net Present Value (NPV) and Internal Rate of Return (IRR) from Projects.

| Item              | Project A (US\$) | Project B (US\$) |
|-------------------|------------------|------------------|
| Cost              | 2,625,889        | 2,804,431        |
| Income/year (1-5) | 939,502          | 2,224,911        |
| Discount rate     | 10%              | 10%              |
| NPV               | 3,561,452        | 8,434,163        |
| IRR               | 23%              | 73%              |

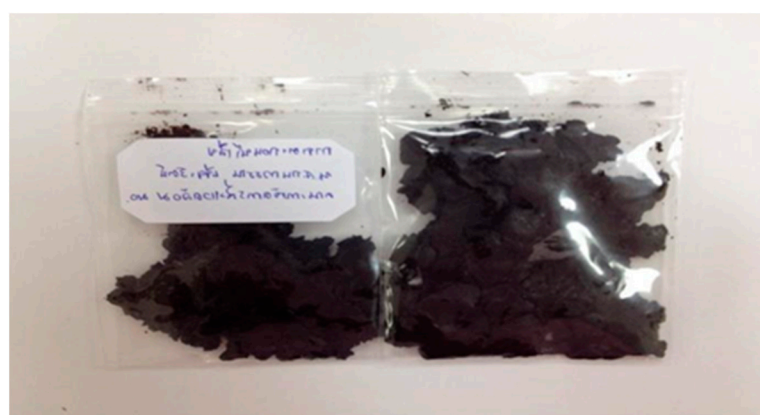

**Figure S1.** Sludge residue after 25 days of digestion.
